# Supplementary material for: Similarities and differences between potassium and ammonium ions in liquid water: a first-principles study
Source: Royal Society of Chemistry journal article supplement (doi:10.1039/c9cp06163k), 2020-01-01
Supplement: c9cp06163k1.pdf [file c9cp06163k1.pdf]

**Supporting Information to:**

**Similarities and Differences between Potassium  
and Ammonium Ions in Liquid Water: A  
First-Principles Study**

Fikret Aydin,<sup>†</sup> Cheng Zhan,<sup>†</sup> Cody Ritt,<sup>‡</sup> Razi Epsztein,<sup>‡,¶</sup> Menachem  
Elimelech,<sup>‡</sup> Eric Schwegler,<sup>†</sup> and Tuan Anh Pham<sup>\*,†</sup>

<sup>†</sup>*Quantum Simulations Group, Materials Science Division, Lawrence Livermore National  
Laboratory, Livermore, CA 94550, USA*

<sup>‡</sup>*Department of Chemical and Environmental Engineering, Yale University, New Haven,  
CT, 06520-8286, USA*

<sup>¶</sup>*Faculty of Civil and Environmental Engineering, Technion-Israel Institute of Technology,  
Technion City, Haifa 32000, Israel*

E-mail: pham16@llnl.gov

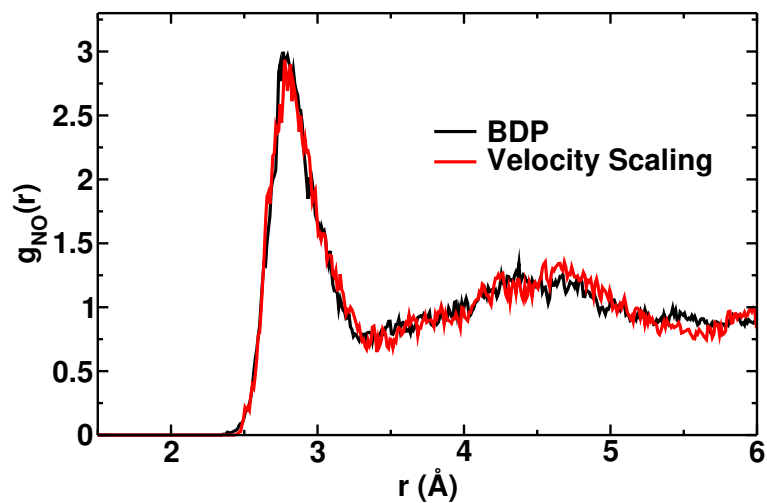

Figure S1: Nitrogen–oxygen radial distribution functions computed for solvated  $\text{NH}_4^+$  in liquid water. Black and red lines indicate results obtained from 20 ps NVT simulations using Bussi-Donadio-Parrinello (BDP) and velocity scaling thermostats, respectively.
